# Supplementary material for: Complex Percutaneous Coronary Intervention Outcomes in Older Adults
Source: PubMed Central journal article supplement — J Am Heart Assoc. 2023 Sep 30;12(19):e029057. doi: 10.1161/JAHA.122.029057 (PMC10727245; doi:10.1161/jaha.122.029057), 2023-09-30

# **SUPPLEMENTAL MATERIAL**

**Figure S1. Plot of Scaled Schoenfeld Residuals versus Time.** Figure plots the Schoenfeld residuals from 3 proportional hazards models in the primary analysis to demonstrate non-violation of the proportional hazards assumption for each model.

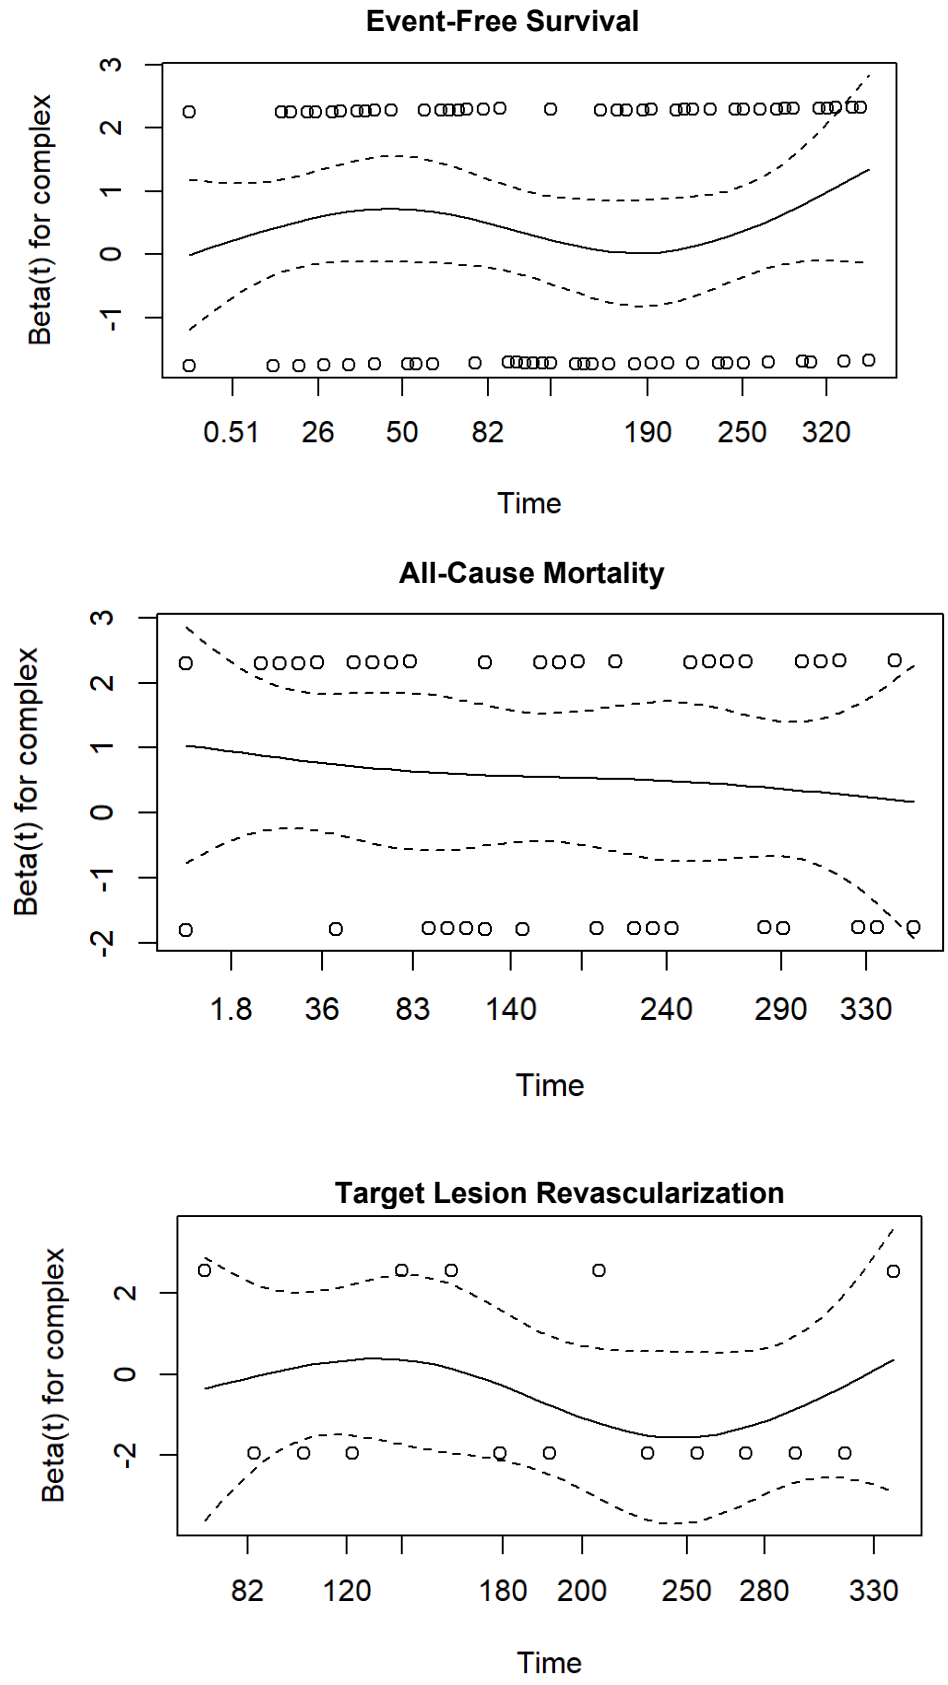

Supplement: JAH3-12-e029057-s001.pdf [file JAH3-12-e029057-s001.pdf]
